# Supplementary figures and images for: Asymmetric ON-OFF processing of visual motion cancels variability induced by the structure of natural scenes
Source: eLife journal article supplement (doi:10.7554/elife.47579), 2019-10-14

**A**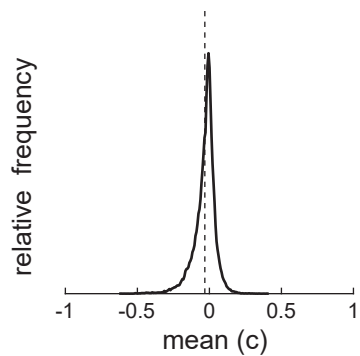**B**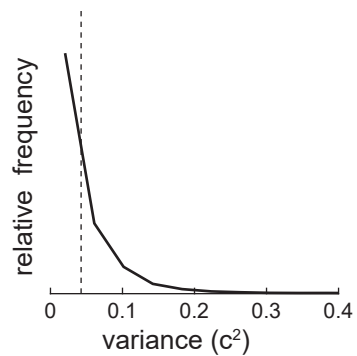**C**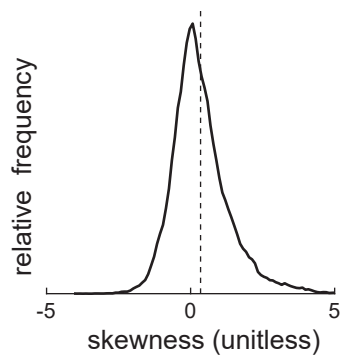**D**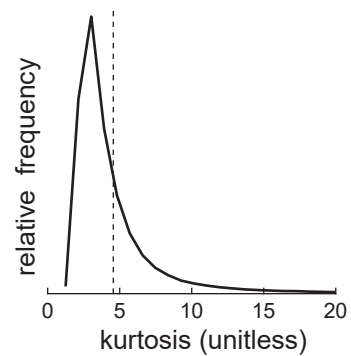**E**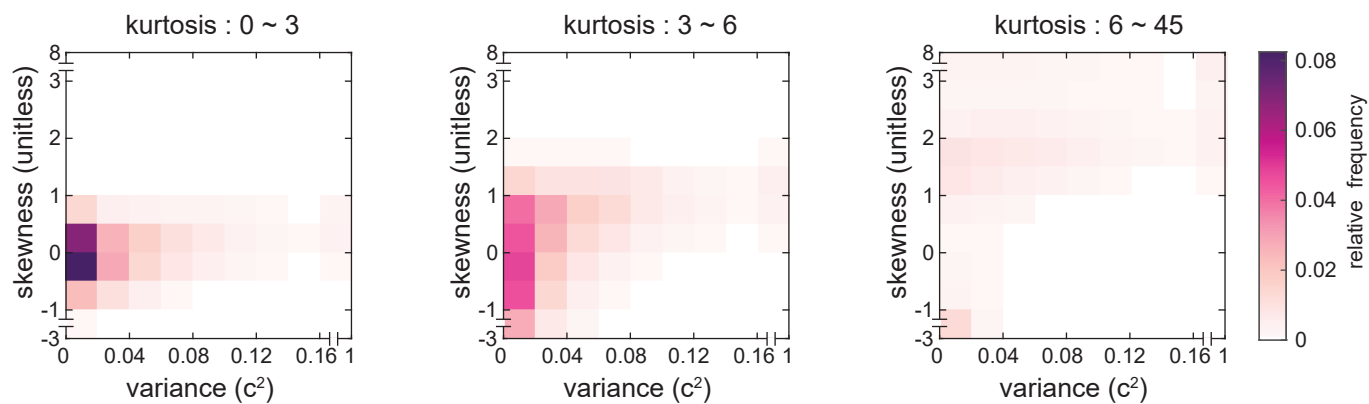

Supplement: supp [file elife-47579-supp-v1.zip]

**A**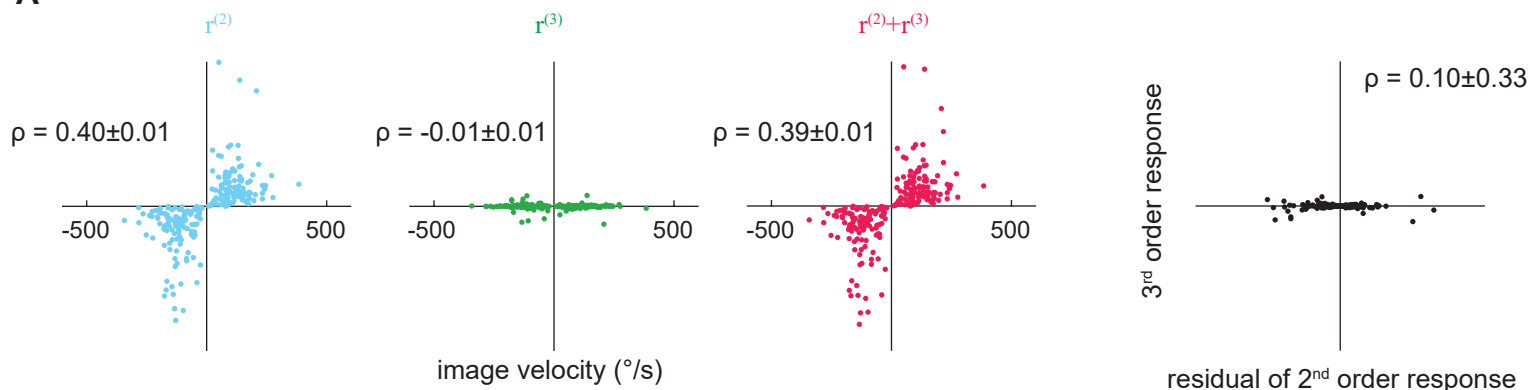**B**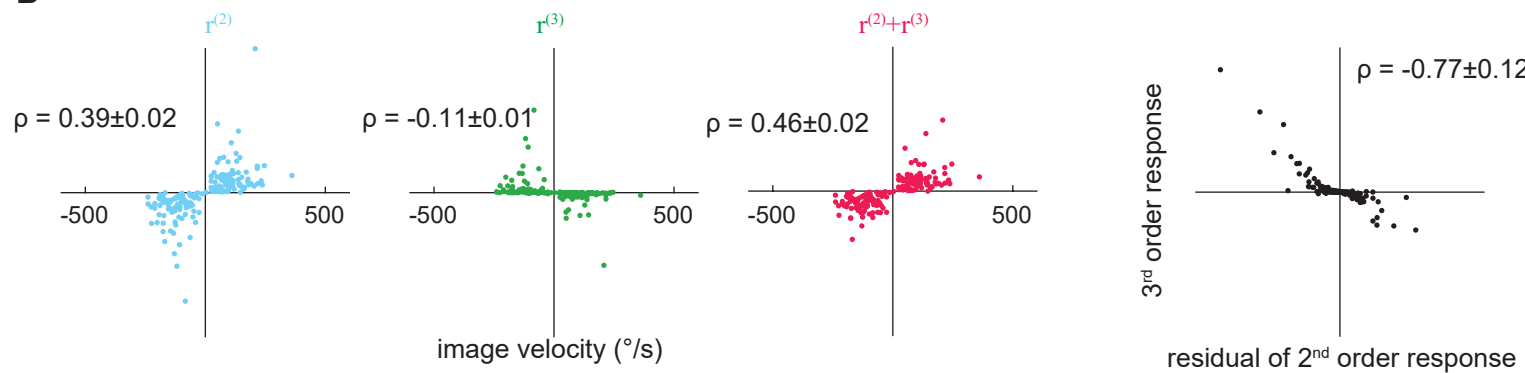**C**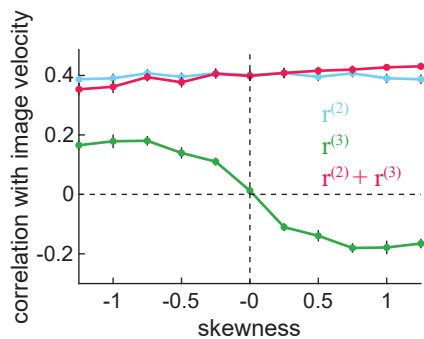**D**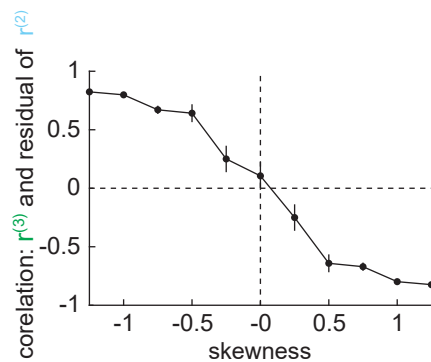**E**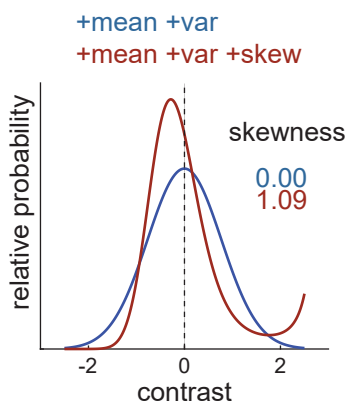**F**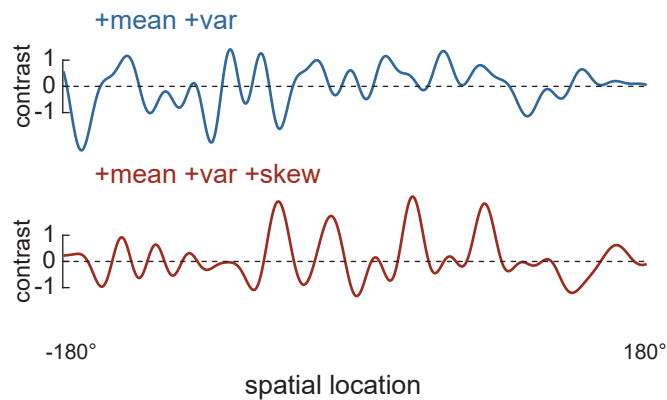**G**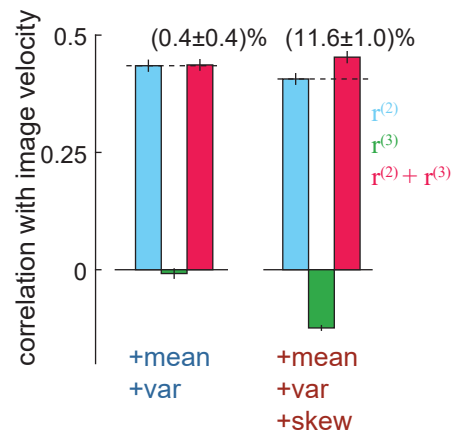

Supplement: supp [file elife-47579-supp-v1.zip]

**A**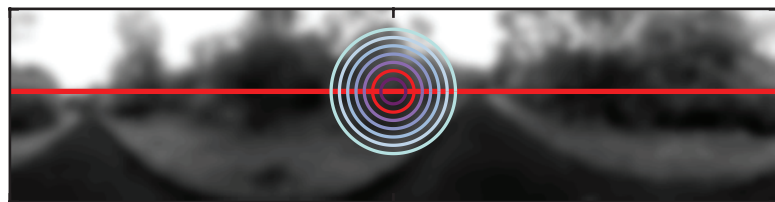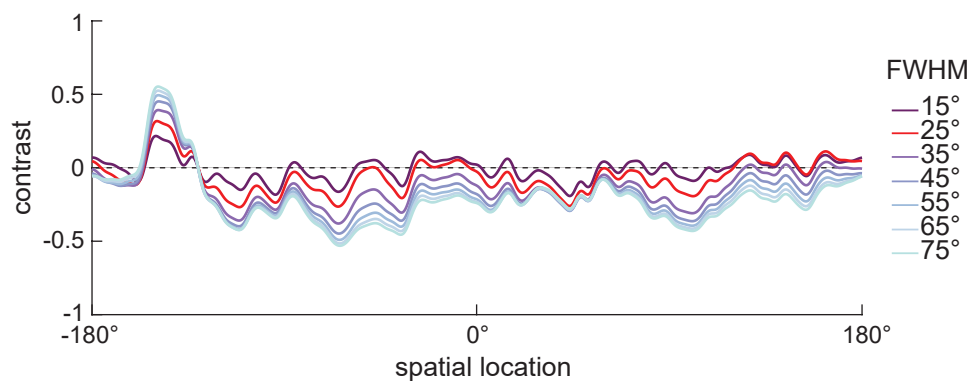**B**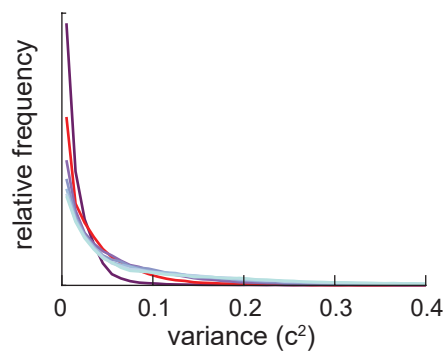**C**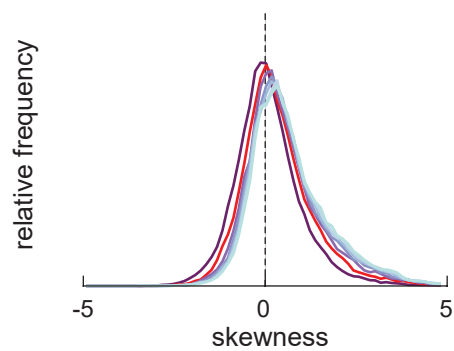**D**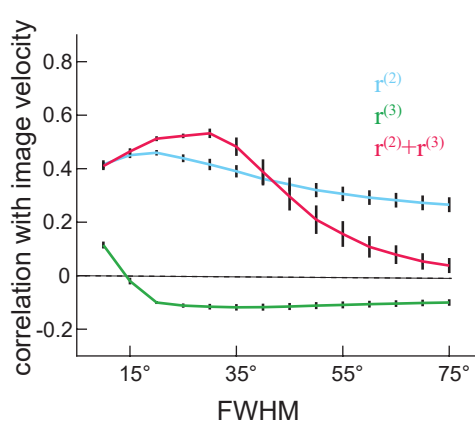**E**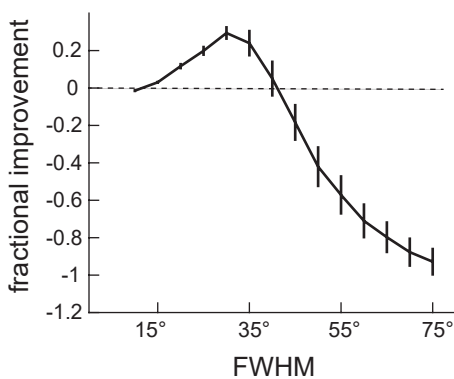**F**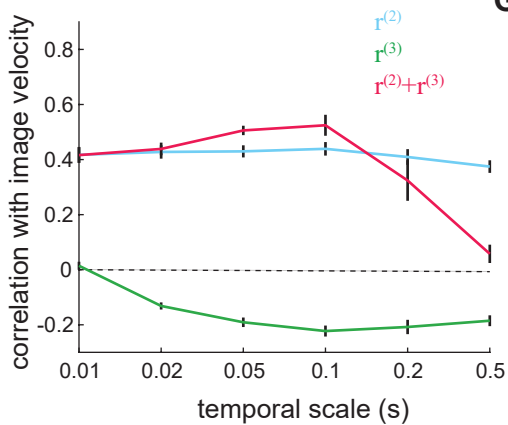**G**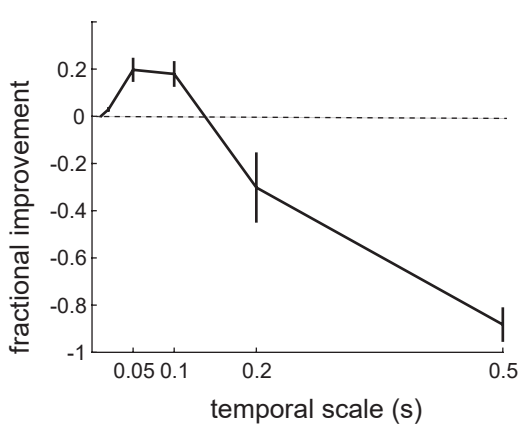

Supplement: supp [file elife-47579-supp-v1.zip]

**A**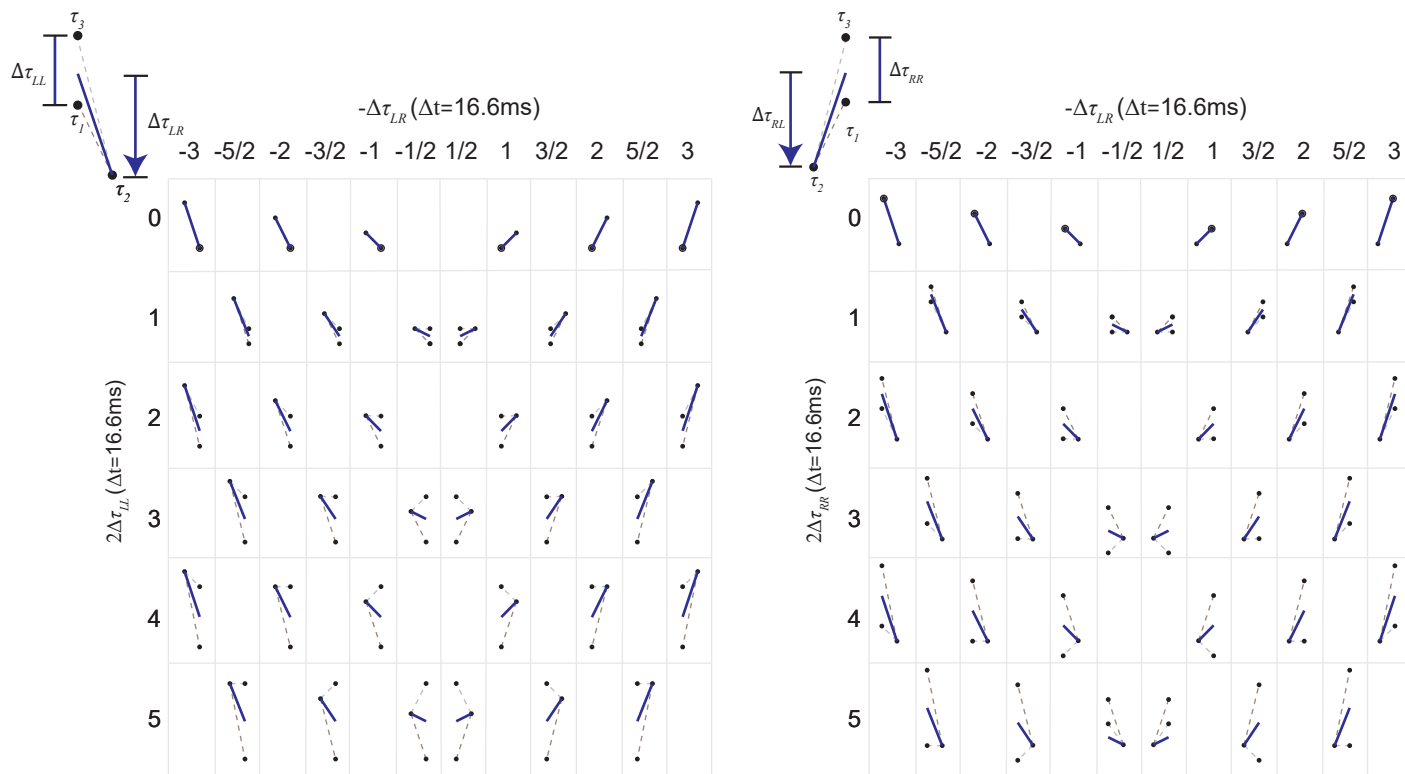**B**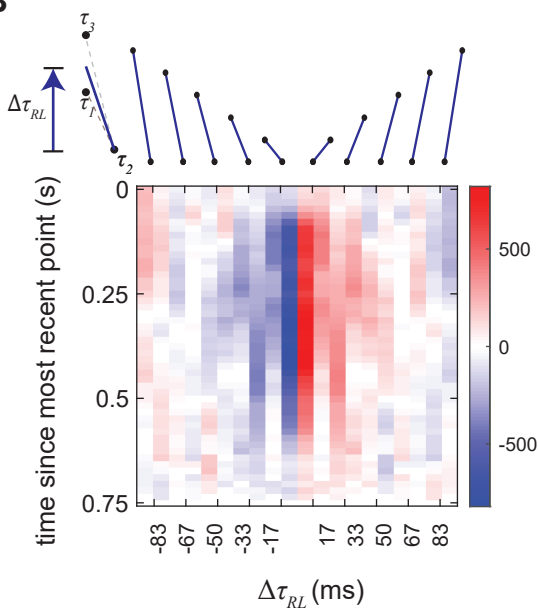**C**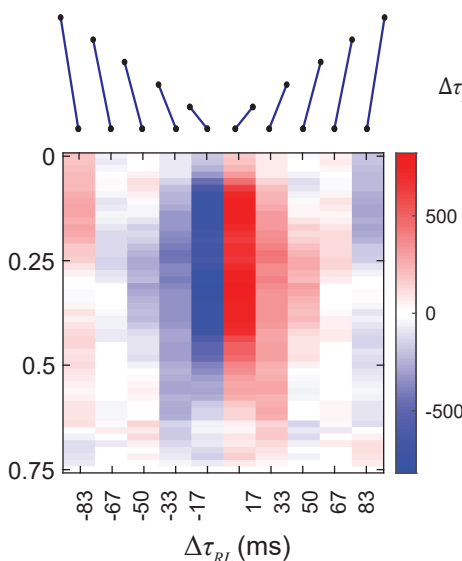**D**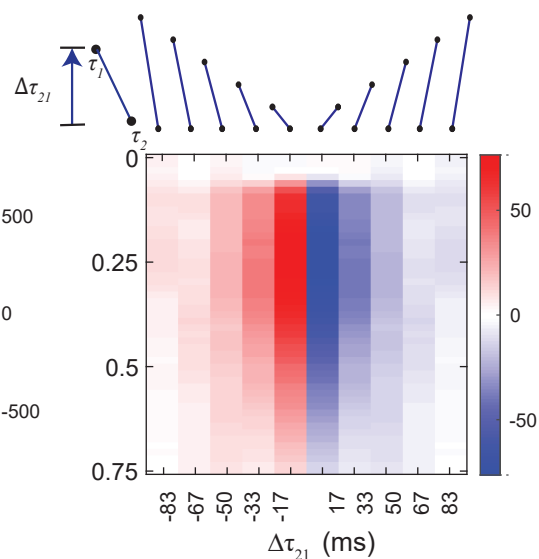**E**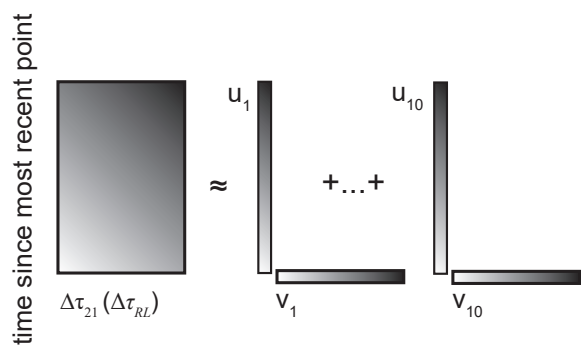**F**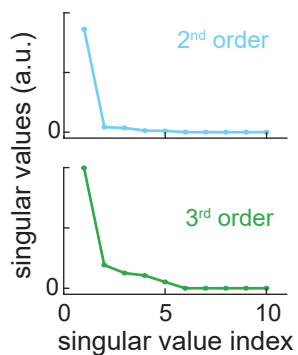**G**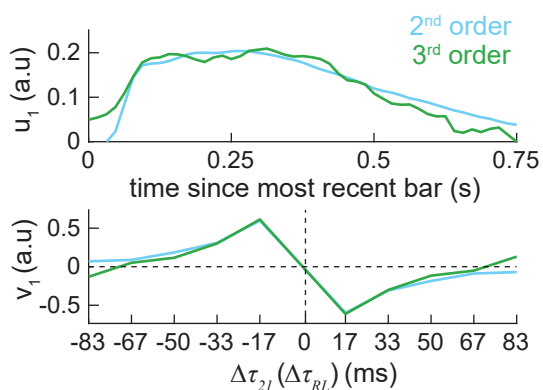

Supplement: supp [file elife-47579-supp-v1.zip]

**A**

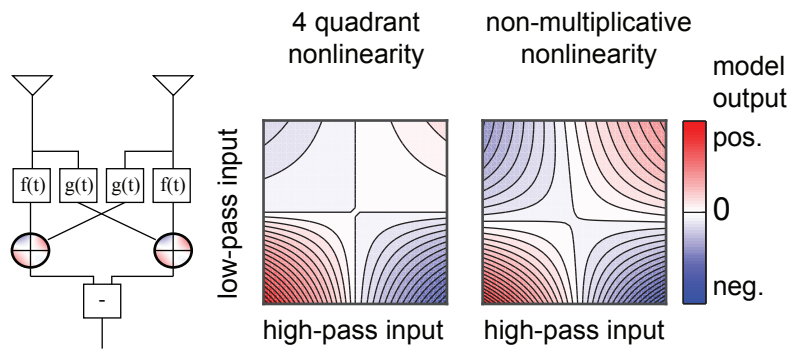

**B**

unrestricted nonlinearity

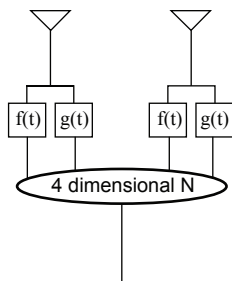

**C**

extra input nonlinearity

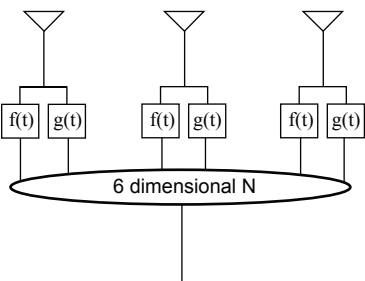

Supplement: supp [file elife-47579-supp-v1.zip]

**A**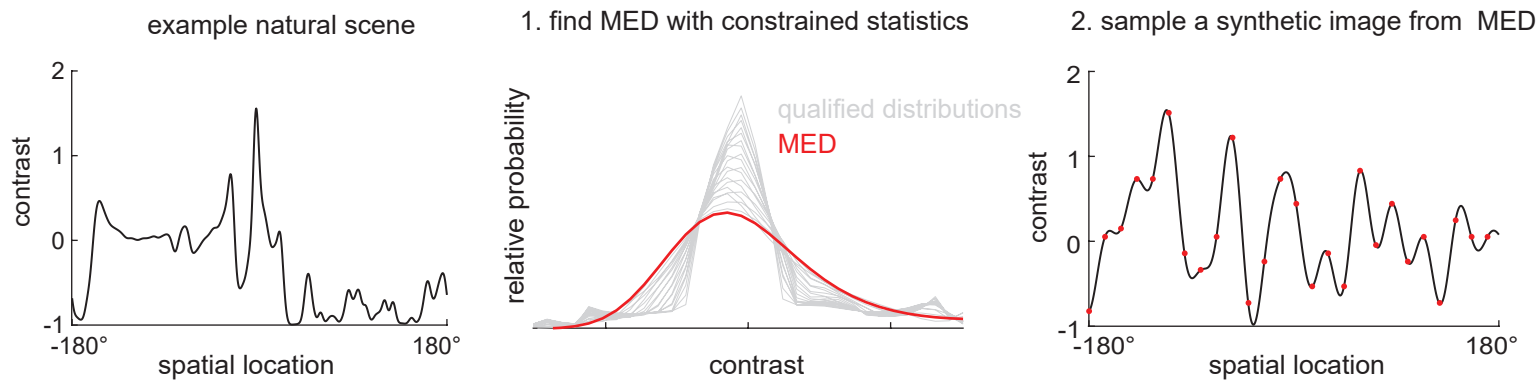**B**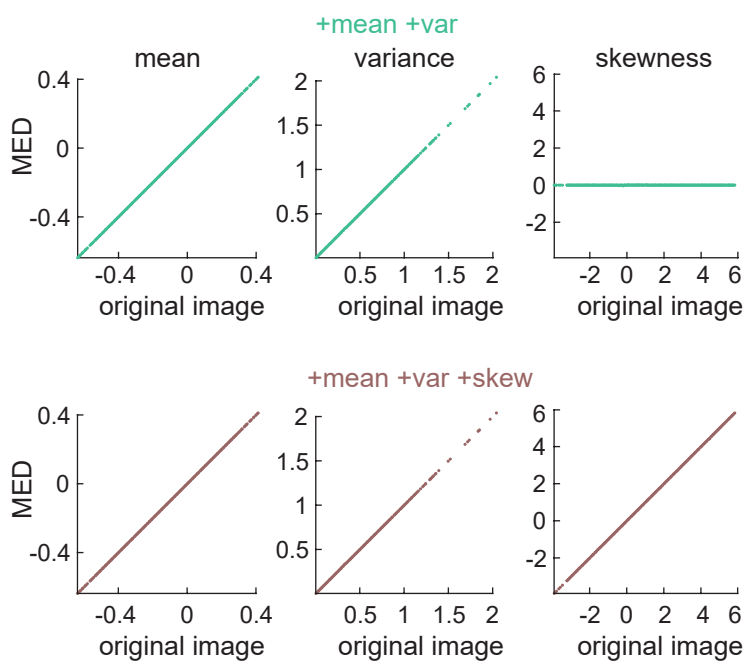**C**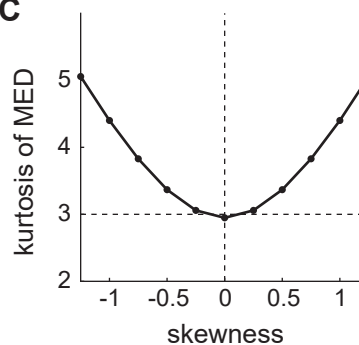

Supplement: supp [file elife-47579-supp-v1.zip]

**A**

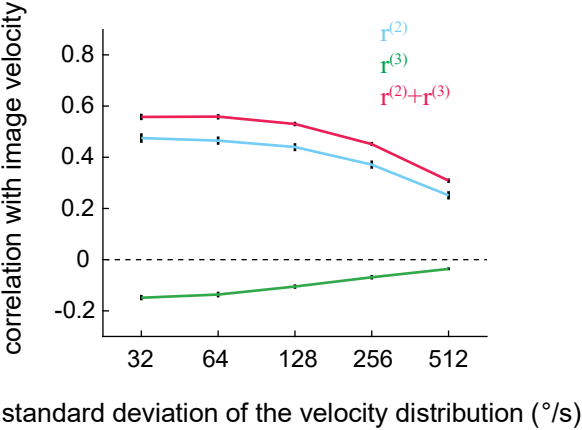

**B**

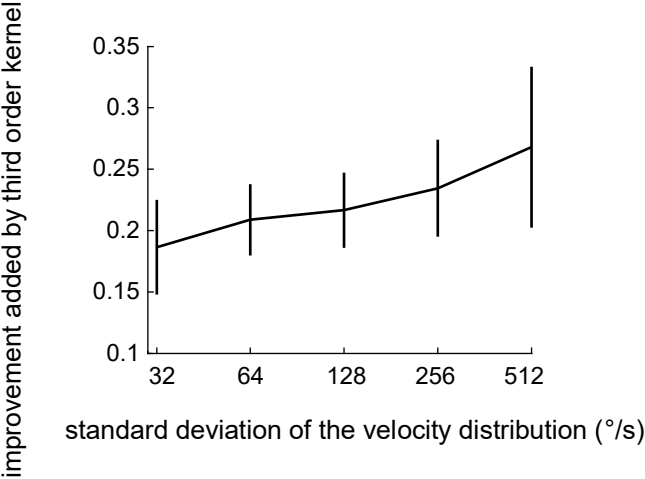

Supplement: supp [file elife-47579-supp-v1.zip]

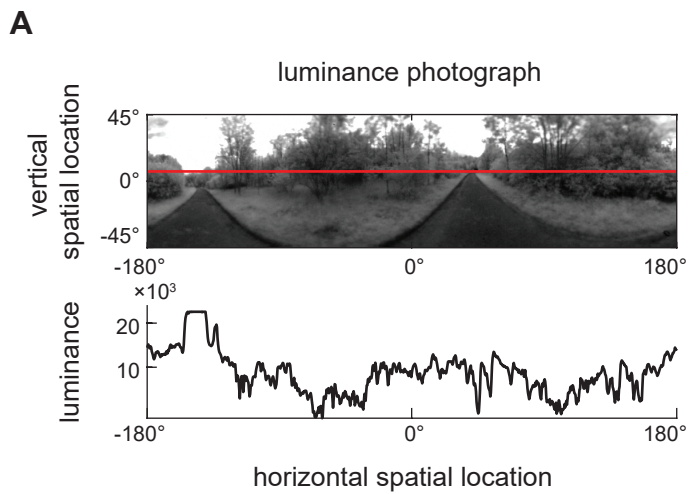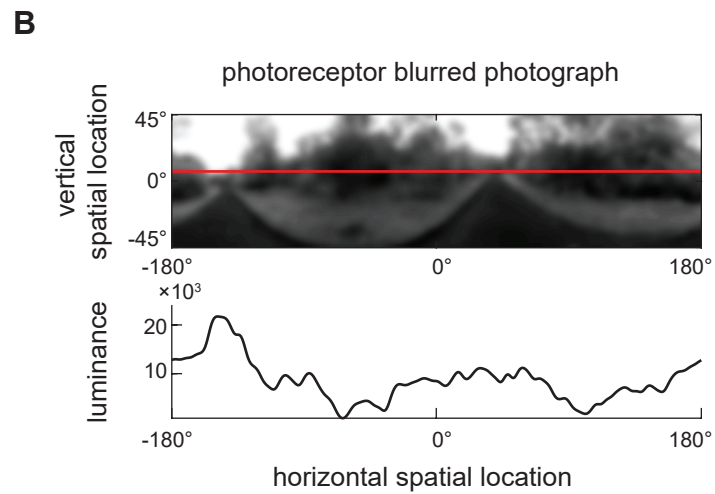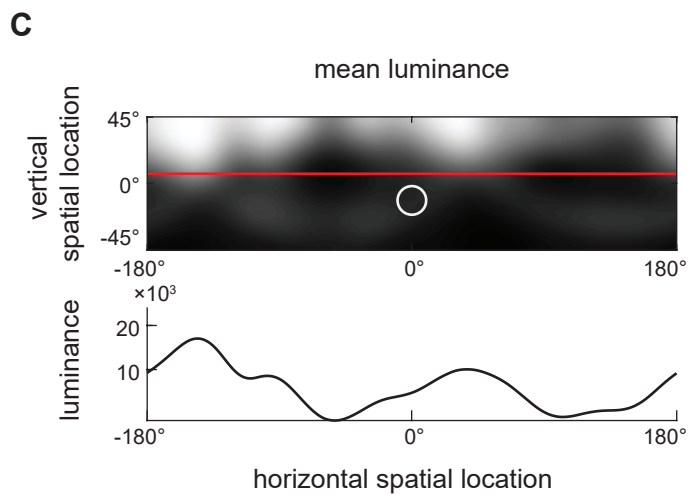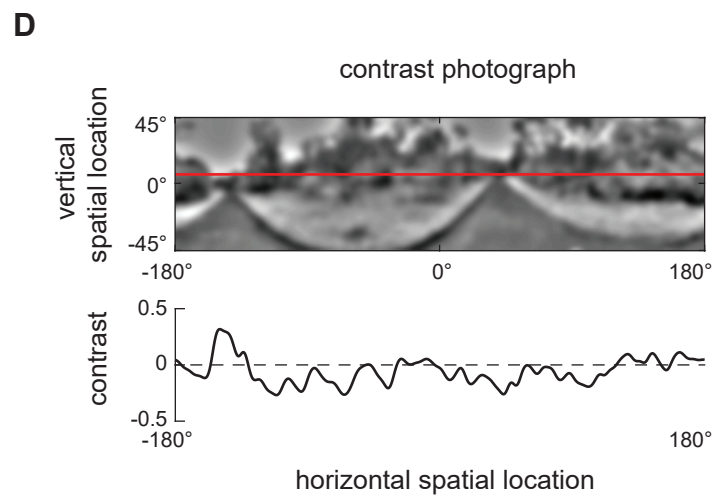

Supplement: supp [file elife-47579-supp-v1.zip]

**A**

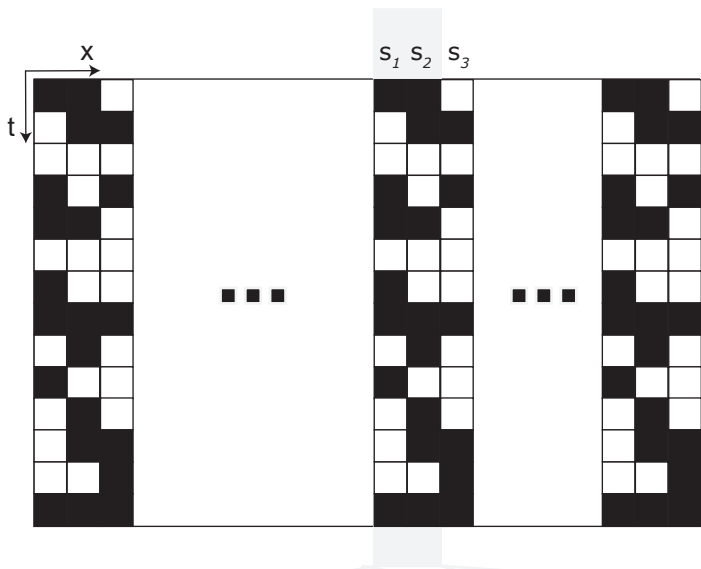

# B

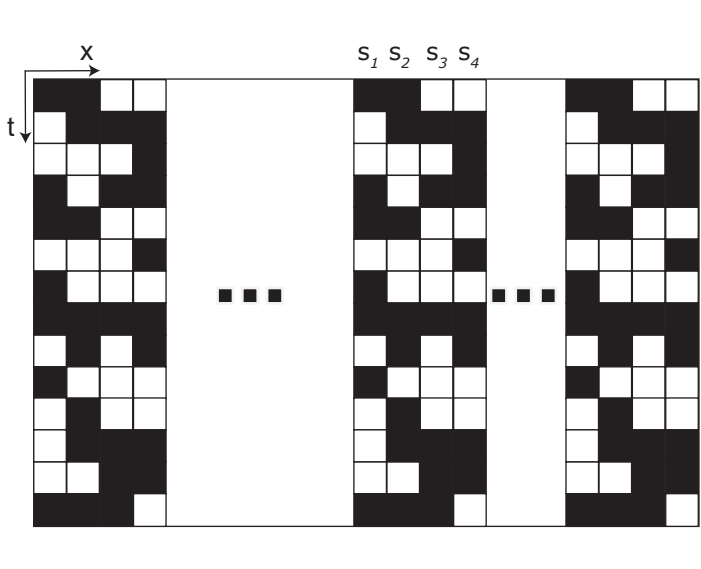

**C**

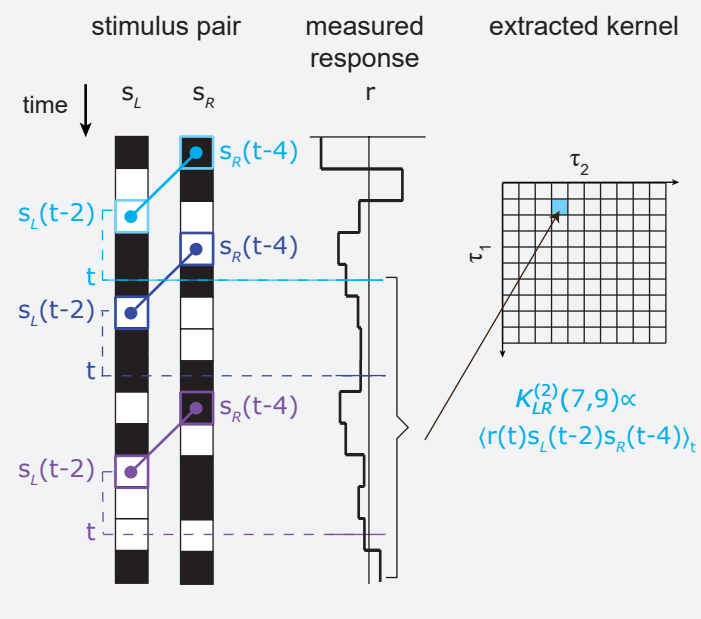

D

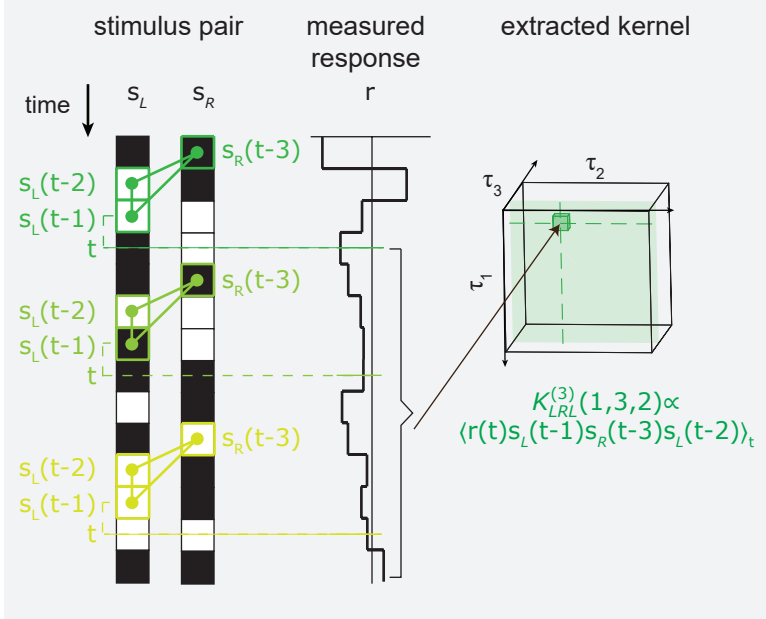

Supplement: supp [file elife-47579-supp-v1.zip]

**A**

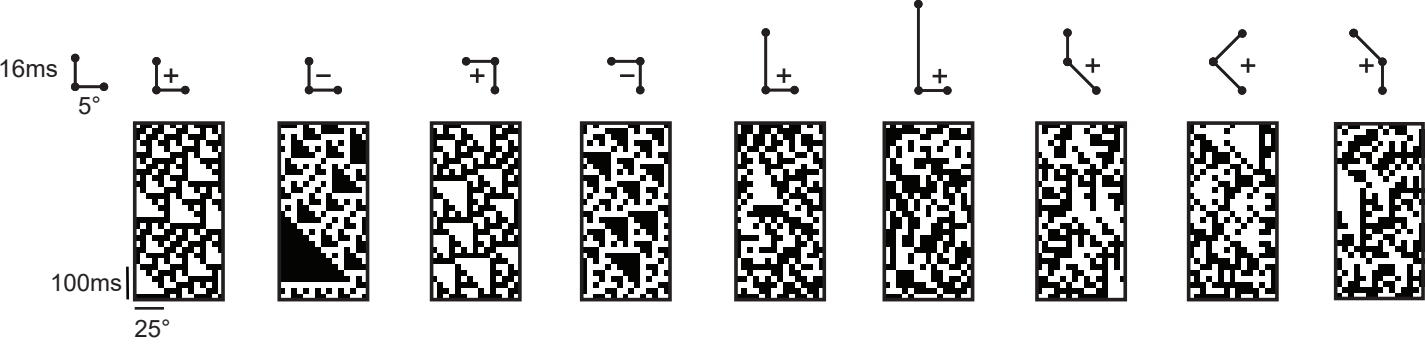

**B**

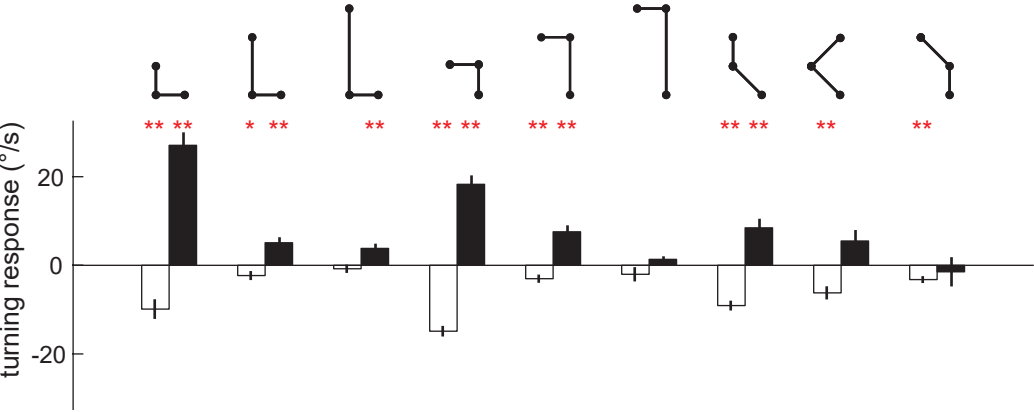

Supplement: supp [file elife-47579-supp-v1.zip]
